# Supplementary material
Source: ML conference proceedings conference paper supplement (https://openaccess.thecvf.com/content/CVPR2024/html/Pu_Federated_Generalized_Category_CVPR_2024_paper.html)
Supplement: Supplementary file 2 [file Pu_Federated_Generalized_Category_CVPR_2024_supplemental.zip]

# Federated Generalized Category Discovery

## Supplementary Material

### 7. Dataset Splitting in Fed-GCD benchmark

To facilitate the study of Fed-GCD task, we re-organize three commonly-used generic image classification datasets (*i.e.*, CIFAR-10, CIFAR-100 and ImageNet-100) and three more challenging fine-grained image classification datasets (*i.e.*, CUB-200, Stanford Cars, and Oxford-IIIT Pet) to construct a new Fed-GCD benchmark.

For each dataset, first, we sample a subset of half the classes as “Old” categories in the original training set, and 50% of instances of each labeled class are drawn to form the labeled set, and all the remaining data form the unlabeled set. With the same rate of labeled-unlabeled splitting, we split the original testing set into labeled and unlabeled subsets for class number estimation and GCD testing on server. Then, we further leverage the  $\beta$ -Dirichlet distribution to split the training set into  $N^L$  subsets, where the  $N^L$  subsets are regarded as local datasets individually stored in each client. The detailed statistics of all splits are elaborated in Tab. 6.

### 8. Evaluation Protocols with Different Data Heterogeneity

Due to the varying data distribution in different Fed-GCD applications, we present two evaluation protocols to separately simulate the normally heterogeneous (**NH**) and extremely heterogeneous (**EH**) scenarios by adjusting  $\beta$  in Dirichlet distribution. Specifically, we set  $\beta = 0.2$  and  $\beta = 0.05$  for **NH** and **EH**, respectively. The statistics of the dataset splits under the two evaluation protocols are described in Tab. 6, in which the **NH** setting exists few common classes but there is no labeled categories shared across all clients in the **EH** setting. For each dataset, we learn a global model in a decentralized training fashion. During testing, we first estimate the number of the potential categories (*i.e.*,  $k$ ) in the non-overlapping test set by using the labeled data stored on server. Then we calculate the maximum of clustering accuracy between the ground truth labels and the label assignment with the estimated  $k$  over the set of permutations via Hungarian algorithm. Last, we measure the clustering accuracy for “All”, “Old” and “New” categories, respectively. All the statistics of the dataset splits and evaluation protocols are described in Tab. 6.

### 9. Visualization of Learned GMMs.

To explore how the learned Global-Local GMMs work, we visualize the T-SNE embeddings of the means of each component of GMMs. We use circles with different color

to represent 7, 9, 11, 15 and 19 local GMM centers from client 1, 2, 3, 4 and 5, respectively. 9 global GMM centers are denoted by concentric circles. The number of clusters in each client is automatically estimated by semi-FINCH and the number of global clusters is estimated by fully-unsupervised FINCH. Through analyzing the visualization results, we find that **1**) most global cluster centers are located at the ground-truth centers without accessing to raw data, which demonstrates the effectiveness of category knowledge aggregation; **2**) as for the blue-green cluster in the purple dashed line, global cluster may server as a super-class to provide distinct semantics for improving representation discriminability.

### 10. Experiments with Different Number of Clients

In real-world federated generalized category discovery (Fed-GCD), the number of local stations (clients) often varies for different discovery tasks. For example, a biodiversity research center would like to explore comprehensive global species distribution, which is inevitable to build many clients all over the world. As indicated in existing federated learning studies, increasing the number of clients may lead the global model to divergence, which gives rise to a more severe challenge for training Fed-GCD systems. To attempt to investigate this challenge, we first evaluate “FedAvg + GCD”, “FedAvg + GCL”, “FedAvg + AGCL”, “Centralized-GCD” and “Centralized-GCL” on the scenario of  $N^L = 10$ . As summarized in Tab. 7, the large number of clients results in a significant performance degradation compared with centralized training, especially on CIFAR10 dataset. Moreover, our client semantics association impacts by the increasing of the number of clients, because large number of clients tend to generate local extremely-heterogeneous GMMs. This further leads uniformly-sampled features to be biased, which hinders effectively clustering and category aggregation due to lack of prior knowledge for rectifying the biased distribution.

In short, the experiments with different values of  $N^L = 5$  are studied in the main text. The experiments with  $N^L = 10$  are studied in Tab. 7. Comparing the centralized training and FedAvg baseline, GCD suffers from a larger performance drop than our GCL. Specifically, compared to “Centralized-GCD”, “FedAvg + GCD” degrades performance by 10.2%, 7.6%, and 9.8% on “All” categories. Our GCL achieves a relatively robust performance by 8.5%, 6%, and 8.8%.

Table 6. The statistics of our Fed-GCD benchmark. We simulate different degrees of data heterogeneity in real-world Fed-GCD scenarios by adjusting the  $\beta$  of parametric Dirichlet distribution to split the local training sets among clients.

| Dataset      | $\beta$ | Client $N^L=5$     |     |                      |     |                         |                  | Server    |          |            |          |
|--------------|---------|--------------------|-----|----------------------|-----|-------------------------|------------------|-----------|----------|------------|----------|
|              |         | # Labelled Classes |     | # Unlabelled Classes |     | # Classes Shared Across |                  | Labelled  |          | Unlabelled |          |
|              |         | Max                | Min | Max                  | Min | all clients             | $\geq 2$ clients | # Classes | # Images | # Classes  | # Images |
| CIFAR10      | 0.2     | 5                  | 4   | 10                   | 9   | 2                       | 5                | 5         | 2500     | 10         | 7500     |
|              | 0.05    | 5                  | 1   | 10                   | 4   | 0                       | 4                | 5         | 2500     | 10         | 7500     |
| CIFAR100     | 0.2     | 50                 | 33  | 100                  | 73  | 16                      | 49               | 50        | 2500     | 100        | 7500     |
|              | 0.05    | 44                 | 17  | 90                   | 40  | 1                       | 43               | 50        | 2500     | 100        | 7500     |
| ImageNet-100 | 0.2     | 50                 | 37  | 100                  | 70  | 16                      | 50               | 50        | 1250     | 100        | 3750     |
|              | 0.05    | 44                 | 17  | 90                   | 40  | 1                       | 47               | 50        | 1250     | 100        | 3750     |
| CUB-200      | 0.2     | 100                | 36  | 200                  | 98  | 5                       | 97               | 100       | 1430     | 200        | 4362     |
|              | 0.05    | 89                 | 25  | 178                  | 59  | 0                       | 84               | 100       | 1430     | 200        | 4362     |
| SCars        | 0.2     | 98                 | 47  | 196                  | 95  | 5                       | 96               | 98        | 2001     | 196        | 6040     |
|              | 0.05    | 87                 | 29  | 177                  | 57  | 0                       | 87               | 98        | 2001     | 196        | 6040     |
| Pet          | 0.2     | 19                 | 12  | 37                   | 22  | 3                       | 19               | 19        | 940      | 37         | 2729     |
|              | 0.05    | 18                 | 5   | 43                   | 16  | 0                       | 17               | 19        | 940      | 37         | 2729     |

- Local GMMs on Client 1
- Local GMMs on Client 2
- Local GMMs on Client 3
- Local GMMs on Client 4
- Local GMMs on Client 5
- ⊙ Global GMMs

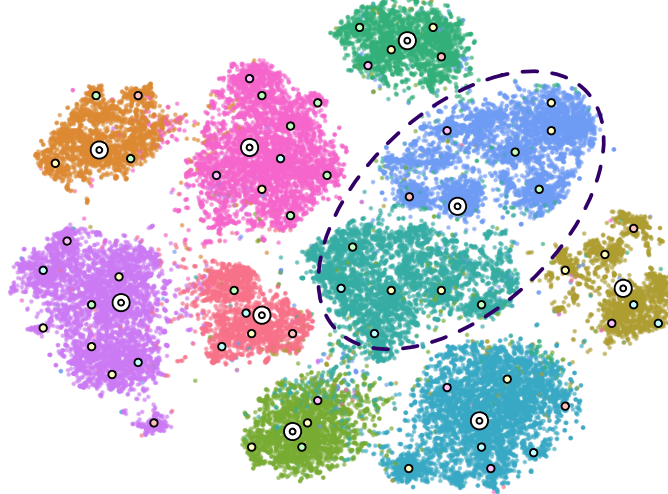

Figure 5. The visualization results on CIFAR10 training dataset. To explore how the learned Global-Local GMMs work, we visualize the T-SNE embeddings of the means of each component of GMMs. We use circles with different color to represent 7, 9, 11, 15 and 19 local GMM centers from client 1, 2, 3, 4 and 5, respectively. 9 global GMM centers are denoted by concentric circles. The number of clusters in each client is automatically estimated by semi-FINCH and the number of global clusters is estimated by fully-unsupervised FINCH. Through analyzing the visualization results, we find that **1) most global cluster centers are located at the ground-truth centers without accessing to raw data, which demonstrates the effectiveness of category knowledge aggregation; 2) as for the blue-green cluster in the purple dashed line, global cluster may server as a super-class to provide distinct semantics for improving representation discriminability.**

## 11. Update of Global and Local GMMs

Details: 1) GMM Update. During client training, local GMMs are updated by the gradient descent based on our GCL losses. The global GMM is updated every communication round. 2) GMM components. We perform semi-FINCH and leverage the accuracy of clustering labeled data

as a metric to estimate the number of categories in local data. Based on the clustering results, local GMMs are initialized with the estimated means, variants and component numbers (i.e, the number of categories). Similarly, we uniformly sample  $N$   $S$  features from each component of each local GMM, to generate a new feature set. Then, we execute unsupervised FINCH to cluster these features for creating

| Setup           | NH setting ( $\beta = 0.05$ ) |             |             |             |             |             |              |             |             |
|-----------------|-------------------------------|-------------|-------------|-------------|-------------|-------------|--------------|-------------|-------------|
|                 | CIFAR10                       |             |             | CIFAR100    |             |             | ImageNet-100 |             |             |
|                 | All                           | Old         | New         | All         | Old         | New         | All          | Old         | New         |
| Centralized-GCD | 83.6                          | 85.8        | 82.0        | 54.9        | 56.1        | 53.7        | 72.1         | 80.7        | 67.5        |
| Centralized-GCL | 86.7                          | 86.7        | 86.7        | 58.5        | 57.2        | 58.1        | 76.1         | 83.7        | 68.4        |
| FedAvg + GCD    | 63.4                          | 60.0        | 66.7        | 47.3        | 48.3        | 45.6        | 62.3         | 70.8        | 60.1        |
| FedAvg + GCL    | <b>68.2</b>                   | <b>64.2</b> | 70.1        | <b>52.5</b> | <b>53.9</b> | 51.0        | 67.3         | 74.5        | 60.8        |
| FedAvg + AGCL   | 68.1                          | 63.8        | <b>70.3</b> | 52.2        | 53.6        | <b>52.4</b> | <b>67.5</b>  | <b>74.8</b> | <b>61.1</b> |

Table 7. Results on generic datasets in the scenario of  $N^L = 10$ . Comparing the centralized training and FedAvg baseline, GCD suffers from larger performance drop than our GCL. Specifically, comparing to “Centralized-GCD”, “FedAvg + GCD” degrades performance by 10.2%, 7.6% and 9.8% on “All” categories. Our GCL achieves a relatively robust performance.

the global GMM. For example, in CUB-200, at the beginning, the estimated class numbers in 5 clients are 63, 84, 117, 183 and 125, respectively, and, we estimate 96 components for the global GMM.

## 12. Algorithm of Federated AGCL framework.

To clarify the pipeline of our AGCL framework. We elaborate the algorithm table in Algorithm 1.

---

### Algorithm 1: Algorithm Pipeline of Federated AGCL.

---

**Input:** Local Models  $\Theta^L$ , Local Data  $\mathcal{D}^L$  and Server Data  $\mathcal{D}^G$ .

**Output:** Global Model  $\Theta^G$ .

```

for  $r = 1$  in  $[1, max\_round]$  do
  for  $n = 1$  in  $[1, N^L]$  do
    Extract feature and perform semi-FINCH
    (Algorithm 3) to initialize  $\mathcal{G}_n^L$ ;
  end
  Clients upload  $\mathcal{G}^L$  to server;
  Server executes Client Semantics Association
  with unsupervised FINCH (Algorithm 2) to
  generate  $\mathcal{G}^G$ ;
  Server distributes  $\mathcal{G}^G$  to each client;
  for  $n = 1$  in  $[1, N^L]$  do
    for  $i = 1$  in  $[1, max\_iteration]$  do
      Sample mini-batches from  $\mathcal{D}_n^L$ ;
      Calculate overall optimization objective
      by  $\mathcal{L}_n$ ;
      Update  $\Theta_n^L$  and  $\mathcal{G}_n^L$  by SGD;
    end
  end
end
Extract feature and Leverage labeled data in  $\mathcal{D}^G$  to
estimate the number of classes in unlabeled data;
Calculate clustering accuracy for “ALL”, “Old” and
“New” categories;

```

---

## 13. Algorithm of Unsupervised FINCH.

During client semantic association, we utilize unsupervised FINCH to generate Global GMM. Here, we elaborate the algorithm table in Algorithm 2. The adjacent matrix of NN graph is established via:

$$A(i, j) = \begin{cases} 1 & \text{if } j = \kappa_i^1 \text{ or } \kappa_j^1 = i \text{ or } \kappa_i^1 = \kappa_j^1, \\ 0 & \text{otherwise,} \end{cases} \quad (10)$$

where  $\kappa^1 \in \mathbb{R}^{N \times 1}$  is first neighbors integer vector.

Then, based on above equation. We follow the pipeline in Algorithm 2 to perform unsupervised parameter-free FINCH clustering. We use the second-level partition on server aggregation in all our experiments.

## 14. Algorithm of Semi-FINCH.

To clarify the pipeline of our AGCL framework. We elaborate the algorithm table in Algorithm 3. Similarly, the NN graph is given by:

$$A(i, j) = \begin{cases} 1 & \text{if } i \text{ and } j \text{ are unlabeled, } j = \kappa_i^1 \text{ or } \kappa_j^1 = i \text{ or } \kappa_i^1 = \kappa_j^1, \\ 1 & \text{if } i \text{ and } j \text{ are labeled, } y_i = y_j, \\ 0 & \text{otherwise,} \end{cases} \quad (11)$$

where  $y_i$  is the ground-truth category label of  $i$  instance.

In short, we first extract features and calculate pair-wise similarities, and search the 1<sup>st</sup>-neighbor of each sample based on the similarities. Next, we force one random labeled sample that belongs to the same category as its 1<sup>st</sup>-neighbor and then apply FINCH algorithm to yield multi-level clustering results. Later, we leverage the clustering accuracy of labeled samples as the index to select the clustering level. Finally, we choose the level that achieve highest clustering accuracy as the estimated results to calculate the cluster-specific mean and covariance to initialize the learnable GMM.

---

**Algorithm 2:** Algorithm Pipeline of unsupervised FINCH.

---

**Input:** Sample set  $\mathcal{S} = \{1, 2, \dots, N\}, \mathcal{S} \in \mathbb{R}^{N \times d}$ , where  $N$  is total number of samples and each sample point is represented by  $d$ -dimension feature vector.

**Output:** Set of Partitions  $\mathcal{P} = \{\Gamma_1, \Gamma_2, \dots, \Gamma_P\}$ , where each partition  $\Gamma_i = \{C_1, C_2, \dots, C_{\Gamma_i} | C_{\Gamma_i} \geq C_{\Gamma_{i+1}}, \forall i \in \mathcal{P}\}$  is a valid clustering of  $\mathcal{S}$ .

The unsupervised FINCH Algorithm:

- 1: Compute first neighbors integer vector  $\kappa^1 \in \mathbb{R}^{N \times 1}$  via exact distance or fast approximate nearest neighbor methods.
- 2: Given  $\kappa^1$  get first partition  $\Gamma_1$  with  $C_{\Gamma_1}$  clusters via Equation 1.  $C_{\Gamma_1}$  is the total number of clusters in partition  $\Gamma_1$ .

**while** there are at least two clusters in  $\Gamma_i$  **do**  
 3: Given input data  $S$  and its partition  $\Gamma_i$ , compute cluster means (average of all data vectors in that cluster). Prepare new data matrix  $M = \{1, 2, \dots, C_{\Gamma_i}\}$ , where  $M_{\Gamma_i} \times d$ .  
 4: Compute first neighbors integer vector  $\kappa^1 \in \mathbb{R}^{C_{\Gamma_i} \times 1}$  of points in  $M$ .  
 5: Given  $\kappa^1$  get partition  $\Gamma_M$  of  $\Gamma_i$  via Equation 1, where  $\Gamma_M \supset \Gamma_i$ .  
**if**  $\Gamma_M$  has one cluster **then**  
 | break  
**else**  
 | Update cluster labels in  $\Gamma_i : \Gamma_M \rightarrow \Gamma_i$   
**end**  
**end**

---

The detailed semi-algorithm is summarized in Algorithm 3.

---

**Algorithm 3:** Algorithm Pipeline of semi-FINCH.

---

**Input:** Sample set  $\mathcal{S} = \{1, 2, \dots, N\}, \mathcal{S} \in \mathbb{R}^{N \times d}$ , where  $N$  is total number of samples and each sample point is represented by  $d$ -dimension feature vector.

**Output:** Set of Partitions  $\mathcal{P} = \{\Gamma_1, \Gamma_2, \dots, \Gamma_P\}$ , where each partition  $\Gamma_i = \{C_1, C_2, \dots, C_{\Gamma_i} | C_{\Gamma_i} \geq C_{\Gamma_{i+1}}, \forall i \in \mathcal{P}\}$  is a valid clustering of  $\mathcal{S}$ .

The semi-FINCH Algorithm:

- 1: Compute first neighbors integer vector  $\kappa^1 \in \mathbb{R}^{N \times 1}$  via exact distance or fast approximate nearest neighbor methods.
- 2: Given  $\kappa^1$  get first partition  $\Gamma_1$  with  $C_{\Gamma_1}$  clusters via Eq. (1).  $C_{\Gamma_1}$  is the total number of clusters in partition  $\Gamma_1$ .

**while** there are at least two clusters in  $\Gamma_i$  **do**  
 3: Given input data  $S$  and its partition  $\Gamma_i$ , compute cluster means (average of all data vectors in that cluster). Prepare new data matrix  $M = \{1, 2, \dots, C_{\Gamma_i}\}$ , where  $M_{\Gamma_i} \times d$ .  
 4: Compute first neighbors integer vector  $\kappa^1 \in \mathbb{R}^{C_{\Gamma_i} \times 1}$  of points in  $M$ .  
 5: Given  $\kappa^1$  get partition  $\Gamma_M$  of  $\Gamma_i$  via Equation 1, where  $\Gamma_M \supset \Gamma_i$ .  
**if**  $\Gamma_M$  has one cluster **then**  
 | break  
**else**  
 | Update cluster labels in  $\Gamma_i : \Gamma_M \rightarrow \Gamma_i$   
**end**  
**end**

---
