# Supplementary material
Source: ML conference proceedings conference paper supplement (https://openaccess.thecvf.com/content/CVPR2024/html/Pu_Federated_Generalized_Category_CVPR_2024_paper.html)
Supplement: Supplementary file 3 [file Pu_Federated_Generalized_Category_CVPR_2024_supplemental.zip]

Archive with 2 entries (2 files):
- 2024081275.pdf
- __MACOSX/._2024081275.pdf
